# Supplementary material
Source: Springer Nature journal article supplement (https://www.springermedizin.de/resource/supplementary/12987_2010_440_MOESM7_ESM.pdf/9612008)

**A**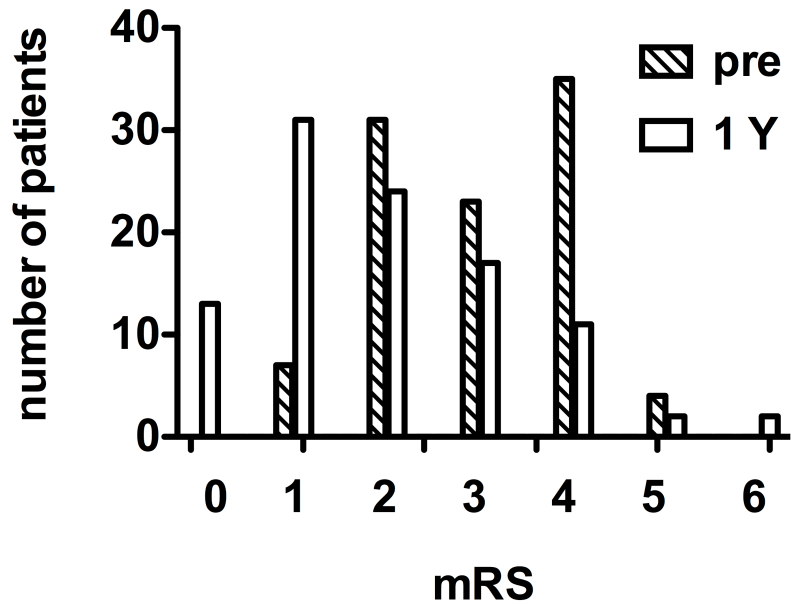**B**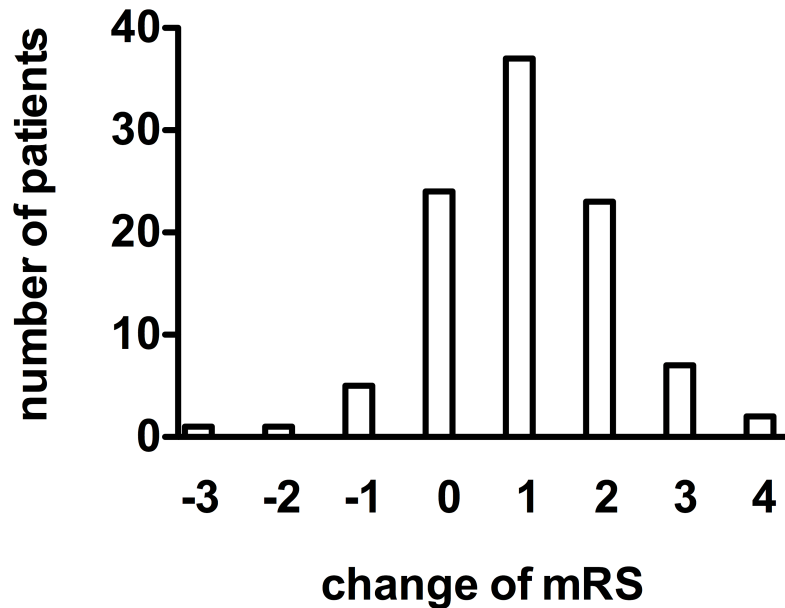

Supplement: MOESM7 [file 9612008]
